# Understanding and reducing statistical uncertainties in nebular abundance determinations

R. Wesson,<sup>1,2\*</sup> D. J. Stock<sup>1,3</sup> and P. Scicluna<sup>1,4</sup>

<sup>1</sup>Department of Physics and Astronomy, University College London, Gower Street, London WC1E 6BT

<sup>2</sup>European Southern Observatory, Alonso de Córdova 3107, Casilla 19001, Santiago, Chile

<sup>3</sup>Department of Physics and Astronomy, University of Western Ontario, London, ON N6K 3K7, Canada

<sup>4</sup>European Southern Observatory, Karl-Schwarzschildstr. 2, 85748 Garching, Germany

Accepted 2012 March 1. Received 2012 February 28; in original form 2011 December 31

## ABSTRACT

Whenever observations are compared to theories, an estimate of the uncertainties associated with the observations is vital if the comparison is to be meaningful. However, many or even most determinations of temperatures, densities and abundances in photoionized nebulae do not quote the associated uncertainty. Those that do typically propagate the uncertainties using analytical techniques which rely on assumptions that generally do not hold.

Motivated by this issue, we have developed Nebular Empirical Analysis Tool (NEAT), a new code for calculating chemical abundances in photoionized nebulae. The code carries out a standard analysis of lists of emission lines using long-established techniques to estimate the amount of interstellar extinction, calculate representative temperatures and densities, compute ionic abundances from both collisionally excited lines and recombination lines, and finally to estimate total elemental abundances using an ionization correction scheme. NEAT uses a Monte Carlo technique to robustly propagate uncertainties from line flux measurements through to the derived abundances.

We show that, for typical observational data, this approach is superior to analytic estimates of uncertainties. NEAT also accounts for the effect of upward biasing on measurements of lines with low signal-to-noise ratio, allowing us to accurately quantify the effect of this bias on abundance determinations. We find not only that the effect can result in significant overestimates of heavy element abundances derived from weak lines, but also that taking it into account reduces the uncertainty of these abundance determinations. Finally, we investigate the effect of possible uncertainties in  $R$ , the ratio of selective-to-total extinction, on abundance determinations. We find that the uncertainty due to this parameter is negligible compared to the statistical uncertainties due to typical line flux measurement uncertainties.

**Key words:** atomic processes – methods: statistical – ISM: abundances.

## 1 INTRODUCTION

Abundance determinations from photoionized nebulae play crucial roles in a variety of astrophysical contexts. The abundance of nebulae around evolved stars, e.g. planetary nebulae or Wolf–Rayet (WR) ejecta nebulae, provide constraints on theories of stellar nucleosynthesis and evolution (e.g. Maeder 1992; Karakas et al. 2009; Magrini, Stanghellini & Gonçalves 2011; Stock, Barlow & Wesson 2011). Such abundances are invaluable as constraints on stellar yields; the *inputs* of galactic chemical evolution models. Meanwhile, Galactic and extragalactic H II regions provide insights into the current composition of the interstellar medium (ISM) and there-

fore are vital constraints for the *output* of galactic chemical evolution models (e.g. Pagel 1997; Matteucci 2003).

Studies of photoionized nebulae have a very long history, stretching back to the dawn of astrophysics (e.g. Huggins & Miller 1864), but some major questions remain unanswered. One example is the sometimes sizeable discrepancy between abundances derived from collisionally excited lines (CELs) and those derived from recombination lines (RLs; Wesson, Liu & Barlow 2005; Liu et al. 2006; García-Rojas & Esteban 2007; Tsamis et al. 2008).

To meaningfully assess whether results determined observationally are consistent or discrepant with model predictions, the uncertainties on both the observations and the model must be estimated. In neither case is such an estimate straightforward. The uncertainty on the observations is a combination of statistical uncertainties, relating ultimately to measurement uncertainties, and systematic

\*E-mail: rwesson@eso.org

uncertainties, which may arise from many sources including the instrumentation used to obtain the line flux measurements, the chosen parametrization of the interstellar reddening law and the methodological choices made in the analysis. Sources of systematic uncertainty may be unknown and even unquantifiable. Finally, the uncertainty attributed to models is perhaps the most difficult to quantify, being related ultimately to the confidence the modeller has that the model encapsulates the underlying physics without excessive simplification or unwarranted assumptions.

We concern ourselves in this paper with an improved understanding of statistical uncertainties and their effect on empirically determined nebular abundances. We present a new code for calculating chemical abundances in photoionized nebulae, which can also robustly estimate statistical uncertainties using a Monte Carlo approach. This method is inherently superior to analytic methods of uncertainty propagation, which rely on assumptions which are almost always violated by the measurement uncertainties inherent to actual astronomical observations.

We use our code to reanalyse several published line lists for which uncertainties are available, and we show first that analytic methods do not give a good representation of the true uncertainties on derived quantities. Generally, uncertainties on derived abundances are better characterized by log-normal distributions than by normal distributions. In some cases, bimodal probability distributions emerge.

Secondly, as the Monte Carlo approach can trivially handle any quantifiable distribution of line flux uncertainties, we have designed the code to account for the well-known upward bias in measurements of weak lines, and associated log-normal distribution of measurement uncertainties (Rola & Pelat 1994). The bias is well known but its actual effect on abundance determinations has not previously been rigorously quantified. We show, as expected, that abundances determined from weak lines are systematically overestimated. Moreover, we show that in addition to removing this bias, accounting for the effect leads to a significant reduction in the uncertainty of abundance determinations from weak lines.

Finally, we investigate the effect of an assumed statistical uncertainty in  $R$ , the ratio of selective-to-total extinction. We show that the extra uncertainty introduced into abundance determinations by taking this parameter to be  $3.1 \pm 0.15$  instead of a fixed value of 3.1 is negligible compared to the uncertainties arising from line flux measurements, even when the extinction is quite large and the line fluxes are well measured.

The words ‘uncertainty’ and ‘error’ are often used synonymously. In this paper we maintain a distinction in meaning between the terms: ‘uncertainty’ refers to the limiting accuracy of the knowledge of a quantity, while ‘error’ refers to an actual mistake.

## 2 STATISTICAL UNCERTAINTIES

Uncertainties in observed quantities can be propagated into the uncertainty on derived parameters in a number of different ways, the two most common of which are the traditional analytical technique based on systems of partial derivatives and simplifying assumptions that allow one to apply Taylor expansions, and the ‘Monte Carlo’ method which is a brute-force iterative method that exploits the wealth of computational power now readily available by building on knowledge of the uncertainty in the original observations.

The analytical approach is as follows: if one has measured a quantity  $x$  with some uncertainty  $\sigma x$ , and wishes to calculate the uncertainty in a quantity  $F$  given that  $F = f(x)$ , then the uncertainty

on  $F$  can be computed via the relation

$$\frac{\sigma F}{\sigma x} \simeq \frac{\partial f}{\partial x}. \quad (1)$$

However, in general one may not be able to compute this partial differential exactly, and in these cases, provided that

$$\left. \frac{\partial f}{\partial x} \right|_{x=x_1} \ll f(x_1), \quad (2)$$

it is possible to use a first-order Taylor expansion to approximate this derivative. If one had a third value,  $H = h(f, g)$  where  $f$  and  $g$  are both functions of other variables and are statistically independent of one another, it would be necessary to find the total derivative  $dH$  such that

$$dH^2 = \left( \frac{\partial h}{\partial f} \right)^2 df^2 + \left( \frac{\partial h}{\partial g} \right)^2 dg^2 \quad (3)$$

and it thus follows that

$$\sigma_H^2 = \left( \frac{\partial h}{\partial f} \sigma f \right)^2 + \left( \frac{\partial h}{\partial g} \sigma g \right)^2. \quad (4)$$

This expression can be generalized to any number of variables, and gives rise to the usual quadrature formulae for many simple functions of  $x$ . We highlight three key aspects of this approach.

- (i) Given that the number of formulae through which the original line flux data must be put before an abundance can be determined, and the wide variety of functions applied, the equations necessary to propagate uncertainties in this way can become extremely complex.
- (ii) The approach implicitly assumes that all the input and output uncertainties at each step are normally distributed.
- (iii) The Taylor expansion requires that the uncertainties be small relative to the quantities.

The first point is a matter of convenience but nonetheless one which discourages many authors from even attempting to propagate uncertainties all the way into the final quantities. The second and third points are clearly violated in many or most real astrophysical observations, by virtue of which the uncertainties estimated using analytical techniques are liable not to reflect the true uncertainties.

As an example of the cumbersome nature of the analytic approach, we consider the estimation of the uncertainty on  $c(H\beta)$ . As described in Section 3.2, our code calculates  $c(H\beta)$  from the flux-weighted average of values derived from  $H\alpha$ ,  $H\gamma$  and  $H\delta$ . Using the analytic approach described above, one finds the uncertainty on the unweighted  $c(H\beta)$  as follows. First,

$$c(H\beta) = \frac{I(H\alpha)c(H\beta)_\alpha + I(H\gamma)c(H\beta)_\gamma + I(H\delta)c(H\beta)_\delta}{I(H\alpha) + I(H\gamma) + I(H\delta)}, \quad (5)$$

where

$$c(H\beta)_\alpha = \frac{\log \left( \frac{I(H\alpha)}{I_0(H\alpha)} \right)}{f(H\alpha)}, \quad (6)$$

and similarly for  $c(H\beta)_\gamma$  and  $c(H\beta)_\delta$ . The analytically estimated uncertainty on  $c(H\beta)$  derived using this method is

$$\frac{\Delta c(H\beta)}{c(H\beta)} = \left( \frac{(\Delta c(H\beta)_\alpha)^2 + (\Delta c(H\beta)_\gamma)^2 + (\Delta c(H\beta)_\delta)^2}{(c(H\beta)_\alpha + c(H\beta)_\gamma + c(H\beta)_\delta)^2} + \frac{(\Delta I(H\alpha)^2 + \Delta I(H\gamma)^2 + \Delta I(H\delta)^2)}{(I(H\alpha) + I(H\gamma) + I(H\delta))^2} \right)^{0.5}, \quad (7)$$

where

$$\Delta c(\text{H}\beta)_\alpha = c(\text{H}\beta)_\alpha \times \left( \left( \frac{\Delta I(\text{H}\alpha)}{I(\text{H}\alpha)} \right)^2 \right) \quad (8)$$

$$+ \left( \frac{0.434 \times \left( \frac{\Delta I_0(\text{H}\alpha)}{I_0(\text{H}\alpha)} \right)^2}{\frac{I(\text{H}\alpha)}{I_0(\text{H}\alpha)}} \right)^{0.5}, \quad (9)$$

and similarly for  $\Delta c(\text{H}\beta)_\gamma$  and  $\Delta c(\text{H}\beta)_\delta$ . The mere derivation of such a formula is tiresome and complicated, and it would be exceedingly easy for errors to be introduced. Even this is somewhat simplified: this equation assumes zero uncertainty in the values of  $f(\text{H}\alpha, \gamma, \delta)$  and  $I_0(\text{H}\alpha, \gamma, \delta)$ . The uncertainty estimated for  $c(\text{H}\beta)$  then has to be propagated into the complex functions of line ratios which are used to give temperatures and densities, and then into the calculations of ionic abundances.

The Monte Carlo method, on the other hand, avoids all of the pitfalls of the analytical method. It exploits the fact that if an observation of a quantity is drawn from a distribution  $X$ , with mean  $x$  and variance  $\sigma_x$ , and if one knows (or can make sensible assumptions about) the shape of this distribution, then a random number generator can be used to repeatedly draw values from  $X$ , creating a random sample from it. Using the above example of  $F = f(x)$ , if one wanted to examine the uncertainty in  $F$ , the operation  $f(x)$  could be performed upon every value in the aforementioned sample to produce a sample of the distribution from which  $F$  is drawn, which can then be parametrized to estimate the type, mean and standard deviation of this distribution. This process can be repeated ad infinitum for any number or combination of functions of  $F$ ,  $x$ , or any other variable derived in the same way to propagate the uncertainties on the quantities, irrespective of the size of the uncertainties and any statistical interdependence of the variables. This approach thus has the following advantages over the analytical approach.

- (i) It is inherently very simple.
- (ii) Any distribution of uncertainties can be propagated at any stage.
- (iii) It does not require relative uncertainties to be small.

The Monte Carlo approach is thus inherently robust when applied to real astrophysical data, in a way that the analytical approach is not. The only limitation is then the time taken to run the calculation enough times to sample well the statistics of the output distributions.

### 3 NEAT: NEBULAR EMPIRICAL ABUNDANCE TOOL

We have developed a new code, Nebular Empirical Analysis Tool (NEAT), to quickly carry out a thorough analysis of emission-line spectra, and to propagate statistical uncertainties using the Monte Carlo technique described above. In this section we describe the code and how it works.

#### 3.1 Input

NEAT incorporates elements of several previous codes, most importantly the EQUIB code, for solving the equations of statistical equilibrium in multilevel atoms. All the source code, documentation, atomic data and example line lists are freely available at <http://www.sc.eso.org/~rwesson/codes/neat/>. The code is designed to be as simple as possible from the user's perspective, and our aim

**Table 1.** Atomic data used in NEAT for recombination lines.

| Ion                            | Recombination data source             |
|--------------------------------|---------------------------------------|
| C <sup>2+</sup>                | Davey, Storey & Kisielius (2000)      |
| C <sup>3+</sup>                | Pequignot, Petitjean & Boisson (1991) |
| N <sup>2+</sup>                | Escalante & Victor (1990)             |
| N <sup>3+</sup>                | Pequignot et al. (1991)               |
| O <sup>2+</sup> (3s–3p)        | Storey (1994)                         |
| O <sup>2+</sup> (3p–3d, 3d–4f) | Liu et al. (1995)                     |
| Ne <sup>2+</sup> (3s–3p)       | Kisielius et al. (1998)               |
| Ne <sup>2+</sup> (3d–4f)       | Storey (unpublished)                  |

is that the user should be able to simply pass the code a line list and get out abundances determined by an objective methodology in which the user does not need to make any choices. The code has no external dependencies and should compile without problems on any Unix-based system. We have also verified that it compiles and runs on Windows systems, should the user be restricted to such an OS.

#### 3.1.1 Atomic data

Hydrogen recombination data from Storey & Hummer (1995) and helium recombination data from Smits (1996) are used throughout. Helium abundances are corrected for collisional effects using the formulae provided by Kingdon & Ferland (1995).

All atomic data for heavier elements are stored externally in plain text files, so that the user can easily change the atomic data being used without needing to edit or recompile the code. We provide three sets of atomic data for CELs with the code – a compilation from a variety of sources compiled on an ad hoc basis, CHIANTI5.2 (Landi et al. 2006) and CHIANTI 6.0 (Dere et al. 2009). In all the analyses presented in this paper, we used atomic data from CHIANTI 5.2, with the exception of data for O<sup>+</sup> for which a documented error exists in the CHIANTI 5.2 data (Kisielius et al. 2009), and S<sup>2+</sup>, which we believe is affected by a similar error. For O<sup>+</sup> we used transition probabilities from Zeippen (1982) and collision strengths from Pradhan (1976); for S<sup>2+</sup> we used transition probabilities from Mendoza & Zeippen (1982) and collision strengths from Mendoza (1983). For RLs, we use data from the sources given in Table 1.

#### 3.1.2 Line list format

NEAT requires as input a plain text list of rest wavelengths, line fluxes and uncertainties. NEAT currently recognizes 738 lines, 81 of which are CELs and 657 of which are RLs. The code assigns line IDs based on an exact match to its reference list of rest wavelengths. Different sources of atomic data often quote slightly different rest wavelengths for a given line; we include with NEAT a separate code to read in line lists and reassign rest wavelengths to the values which NEAT recognizes. Lines that are not recognized are ignored in the analysis.

Some cases of line blends can be accounted for; for example, the [O II] lines at 3726 and 3729 Å may be blended in low-resolution spectra. In this case, a rest wavelength of 3727.00 can be given, and the code will properly treat the combined flux. Blends of RLs cannot currently be accounted for but we plan to develop means of doing so in future versions of NEAT.

For a very small number of RLs, close coincidences in rest wavelengths may lead to misidentifications. For example, three weak O II 3d–4f transitions from multiplets V63c, V78b and V63c have rest

wavelengths of 4315.39, 4315.39 and 4315.40, respectively. These three lines will almost certainly be detected as a blend if detected at all. At the moment, NEAT would attribute all flux at a wavelength of 4315.39 to each of the three lines. The effect on final abundances in this case is likely to be very small, as only very weak RLs are affected. Again, we plan to improve the sophistication of NEAT's approach in future versions.

The user can select the number of iterations of the code to run. If the number of iterations is one, the code performs a standard empirical analysis on the line list, as described below, and does not calculate any uncertainties. If the number of iterations is more than one, then the code randomizes the line list before each iteration. The standard analysis is then carried out on the randomized line list.

### 3.1.3 Line flux randomisation

The code randomizes the line fluxes by assuming that they come from one of the three distributions, depending on the measured signal-to-noise ratio (S/N). The three cases are as follows.

$S/N > 6.0$ . The line flux is assumed to be drawn from a Gaussian distribution. In this case, if the given line flux measurement is  $F$  and the given measurement uncertainty is  $\sigma$ , then in each iteration of the code the line flux is calculated using

$$F_i = F + (R \times \sigma), \quad (10)$$

where  $R$  is a random number drawn from a Gaussian distribution with a mean of zero and a standard deviation of unity.

$1.0 < S/N < 6.0$ . Rola & Pelat (1994, hereafter RP94) observed that measurements of weak lines ( $S/N < 6$ ) are strongly biased upwards, and the uncertainty on such lines cannot be well represented by a normal distribution. We refer to this effect henceforth as the RP effect. Taking the RP effect into account is straightforward with a Monte Carlo approach, requiring only that a log-normal distribution with appropriate mean and standard deviation is used for weak lines, instead of the normal distribution used for strong lines.

For lines with  $F/\sigma < 6$ , we randomize the line fluxes using the following procedure: we first determine the log-normal distribution appropriate to the measured S/N. RP94 gave parameters for the log-normal distributions of  $F_{\text{obs}}/F_{\text{true}}$ , as a function of the observed S/N, and we fitted the following equations to the parameters in their table 6:

$$\mu = \frac{0.076\,5957}{S/N^2} + \frac{1.860\,37}{S/N} - 0.309\,695, \quad (11)$$

$$\sigma = \frac{-1.113\,29}{S/N^3} + \frac{1.8542}{S/N^2} - \frac{0.288\,222}{S/N} + 0.180\,18. \quad (12)$$

From the observed S/N we thus obtain the appropriate  $\mu$  and  $\sigma$ . Then, the line flux is found using the following equation:

$$F_i = \frac{F}{e^{(R \times \sigma + \mu)}}, \quad (13)$$

where  $R$  is a random number from a Gaussian distribution as before. The result of this procedure is that weaker lines are drawn from log-normal distributions that peak below the observed value, with the effect increasing as S/N decreases.

$S/N < 1.0$ . If the quoted uncertainty is larger than the actual line flux, the code assumes that the quoted flux represents a  $5\sigma$  upper limit, and thus draws the randomized line flux from a folded Gaussian distribution, with  $\mu = 0$  and  $\sigma = 0.2 \times F$ . The line flux is given by

$$F_i = \text{abs}(R) \times 0.2F. \quad (14)$$

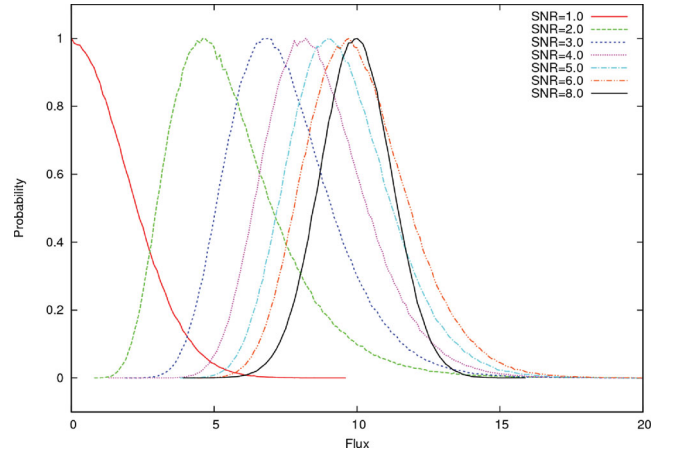

**Figure 1.** The behaviour of NEAT's line flux randomization as a function of S/N, for a fixed measured flux of 10.0. At high S/N (i.e.  $>6$ ), normal distributions apply. At lower S/N, the effect described by Rola & Pelat (1994) results in log-normal distributions which are skewed towards lower values than the measured intensity. If  $S/N \leq 1$  then the code assumes that the quoted flux is a  $5\sigma$  upper limit.

Fig. 1 shows the various possibilities that arise depending on the measured S/N. The distributions plotted are from  $10^6$  runs of NEAT in which seven artificial line fluxes were randomized. Each of the lines had a measured flux of 10.0, and the quoted uncertainties represented S/N values of 1.0, 2.0, 3.0, 4.0, 5.0, 6.0 and 8.0. The figures show how the normal distribution appropriate at high S/N is replaced by a log-normal distribution increasingly skewed towards lower values as S/N decreases.

### 3.1.4 Random number algorithm

This process relies on the FORTRAN RANDOM\_NUMBER command, seeded using the system clock and the time of the code's execution, to generate pseudo-random numbers. The uniformly distributed numbers thus generated are then converted into a Gaussian distribution using an algorithm based on the ratio-of-uniforms method of Kinderman & Monahan (1977), available from netlib.org. We tested the performance of this method by running the code 1000 000 times, and plotting the distribution of fluxes obtained for an arbitrarily selected line. We then fitted a Gaussian function to this distribution. We found that the recovered mean was within 0.008 per cent of the specified value, while the recovered standard deviation was within 0.13 per cent of the specified value. Fig. 2 shows the histogram of generated values with the required Gaussian distribution overlotted. We thus consider that the random number generator in the code provides a reliably random Gaussian distribution.

### 3.1.5 Sampling uncertainty

The Monte Carlo approach relies on carrying out the analysis enough times to adequately sample the probability distributions of the derived quantities. To determine what number of iterations suffices for this purpose, we ran the code 1000 000 times, using emission-line fluxes measured for IC1747 by Wesson et al. (2005). We then considered subsets of the output from this run.

To quantify the sampling uncertainty, we fitted a Gaussian to the observed probability distribution of the measured [O III] temperatures, for each subset of iterations. We chose this quantity as its

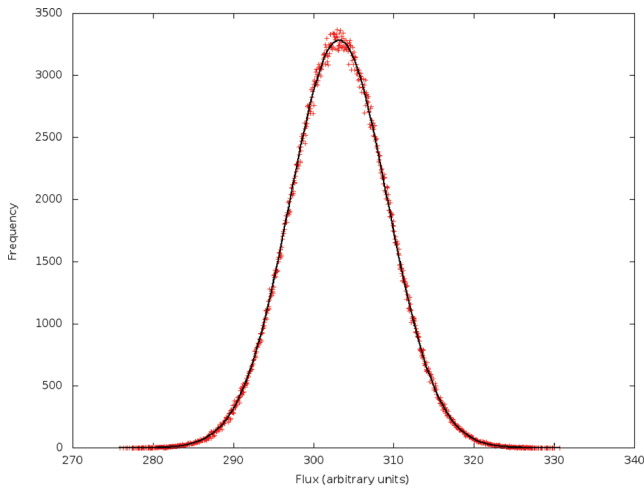

**Figure 2.** A distribution of values produced by 1000 000 runs of the random number generator, with the target Gaussian distribution overplotted.

actual uncertainty distribution should closely approximate a Gaussian. The uncertainty on the Gaussian fit is thus a measure of how well the output distribution was sampled for a given number of iterations. A Gaussian output makes it straightforward to quantify the sampling uncertainty but the magnitude of this uncertainty is a function only of the number of iterations and not of the output distribution, and so the result applies generally.

In Fig. 3 we show how the uncertainty of the fitted  $\mu$  and  $\sigma$  varies with the total number of iterations. We find that the precision of the fit improves indefinitely with increasing number of iterations up to the limit of our investigation. In our own investigations we carried out 10 000 iterations on each line list we investigated; Fig. 3 shows that, by this number of iterations, the sampling uncertainty on the [O III] temperature is of the order of 1 K. We carried out our investigations on single processors of moderately powerful desktop and laptop machines, on which 10 000 iterations typically took around 40–60 min. We plan to parallelize NEAT to enable larger numbers of iterations to be carried out in a conveniently short time.

### 3.2 Interstellar extinction

The first step of any abundance analysis is a correction for interstellar extinction. The amount of extinction is determined by NEAT from

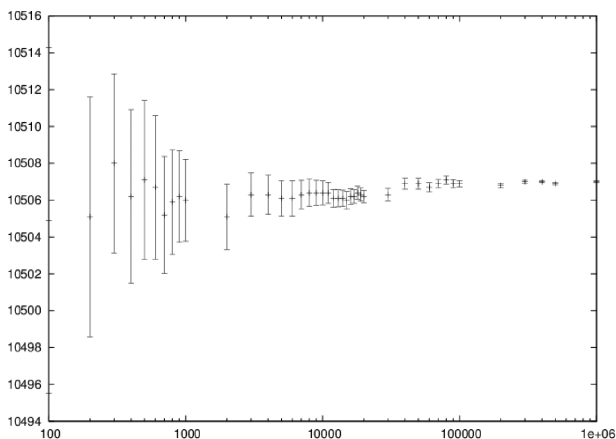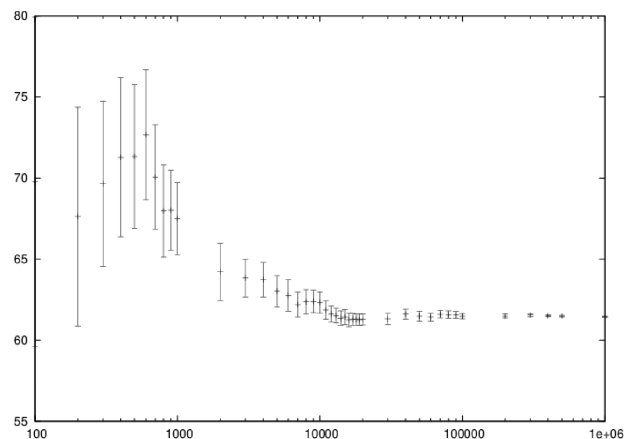

**Figure 3.** The uncertainty on the parameters of Gaussian fits to a NEAT uncertainty distribution for  $T([\text{O III}])$ , as a function of the number of iterations. The figures show the uncertainty on the fitted values of  $\mu$  ( $l$ ) and  $\sigma$  ( $r$ ). We use these as a proxy for the Monte Carlo sampling uncertainty.

the ratios of hydrogen Balmer lines in an iterative procedure: the extinction is first calculated assuming intrinsic  $\text{H}\alpha$ ,  $\text{H}\beta$  and  $\text{H}\gamma$  line ratios for a temperature of 10 000 K and a density of  $1000 \text{ cm}^{-3}$ .  $c(\text{H}\beta)$  is calculated from the flux-weighted average values derived from ratios of the three lines to their intrinsic values, and the line list is dereddened using this value of  $c(\text{H}\beta)$ . Temperatures and densities calculated as described below. Then, the intrinsic Balmer line ratios are recalculated at the appropriate temperature and density, and  $c(\text{H}\beta)$  is recalculated.

The user can select the particular extinction law to be used. Five extinction laws are currently available: the Galactic extinction curves of Howarth (1983), Fitzpatrick & Massa (1990) and Cardelli, Clayton & Mathis (1989); the Large Magellanic Cloud law of Howarth (1983); and the Small Magellanic Cloud law of Prevot et al. (1984). Adding further extinction laws would be straightforward, should the user wish to do so.

In Section 6 we investigate the effect on derived quantities of the likely uncertainty in  $R$ , the ratio of selective-to-total extinction.

### 3.3 Temperatures and densities

Temperatures and densities are calculated using traditional CEL diagnostics. For the purposes of subsequent abundance calculations, the nebula is divided into three ‘zones’ of low, medium and high excitation. In each zone, temperatures and densities are calculated iteratively and weighted according to the reliability of each diagnostic. Table 2 shows the diagnostics used and the weighting given in each zone.

The scheme to calculate the densities is iterative, and proceeds as follows.

- (i) A temperature of 10 000 K is initially assumed, and the density is then calculated from the line ratios relevant to the zone.
- (ii) The temperature is then calculated from the temperature diagnostic line ratios, using the derived density.
- (iii) The density is recalculated using the appropriately weighted average of the temperature diagnostics.
- (iv) The temperature is recalculated using this density.

This iterative procedure is carried out successively for low-, medium- and high-ionization zones, and in each case if no diagnostics are available, the temperature and/or density will be taken to be that derived for the previous zone.

**Table 2.** Diagnostics used in the calculation of physical conditions.

| Diagnostic             | Lines                                                                   | Weight |
|------------------------|-------------------------------------------------------------------------|--------|
| Low-ionization zone    |                                                                         |        |
| [O II] density         | $\lambda 3727/\lambda 3729$                                             | 1      |
| [S II] density         | $\lambda 6717/\lambda 6731$                                             | 1      |
| [N II] temperature     | $\frac{\lambda 6548 + \lambda 6584}{\lambda 5754}$                      | 5      |
| [S II] temperature     | $\frac{\lambda 6717 + \lambda 6731}{\lambda 4068 + \lambda 4076}$       | 1      |
| [O II] temperature     | $\frac{\lambda 7319.20 + \lambda 7330.31}{\lambda 3726 + \lambda 3729}$ | 1      |
| [O I] temperature      | $\frac{\lambda 6363 + \lambda 6300}{\lambda 5577}$                      | 1      |
| [C I] temperature      | $\frac{\lambda 9850 + \lambda 9824}{\lambda 8727}$                      | 1      |
| Medium-ionization zone |                                                                         |        |
| [Cl III] density       | $\lambda 5517/\lambda 5537$                                             | 1      |
| [Ar IV] density        | $\lambda 4711/\lambda 4740$                                             | 1      |
| [C III] density        | $\lambda 1907/\lambda 1909$                                             | 1      |
| [O III] density        | $\lambda 52 \mu\text{m}/\lambda 88 \mu\text{m}$                         | 0      |
| [Ar III] density       | $\lambda 9 \mu\text{m}/\lambda 21.8 \mu\text{m}$                        | 0      |
| [S III] density        | $\lambda 18.7 \mu\text{m}/\lambda 33.8 \mu\text{m}$                     | 0      |
| [Ne III] density       | $\lambda 15.5 \mu\text{m}/\lambda 36.0 \mu\text{m}$                     | 0      |
| [O III] temperature    | $\frac{\lambda 4959 + \lambda 5007}{\lambda 4363}$                      | 4      |
| [Ar III] temperature   | $\frac{\lambda 7135 + \lambda 7751}{5192}$                              | 2      |
| [Ne III] temperature   | $\frac{\lambda 3868 + \lambda 3967}{3342}$                              | 2      |
| [S III] temperature    | $\frac{\lambda 9069 + \lambda 9531}{6312}$                              | 1      |
| [Ne III] temperature   | $\frac{\lambda 3868 + \lambda 3967}{15.5 \mu\text{m}}$                  | 0      |
| [O III] temperature    | $\frac{\lambda 4959 + \lambda 5007}{52 \mu\text{m}}$                    | 0      |
| High-ionization zone   |                                                                         |        |
| [Ne IV] density        | $\frac{\lambda 2423}{\lambda 2425}$                                     | 1      |
| [Ar V] temperature     | $\frac{\lambda 6435 + \lambda 7005}{\lambda 4625}$                      | 1      |
| [Ne V] temperature     | $\frac{\lambda 3426 + \lambda 3345}{\lambda 2975}$                      | 1      |

### 3.4 Ionic abundances

Ionic abundances are calculated from CELs using the temperature and density appropriate to their ionization potential. Where several lines from a given ion are present, the ionic abundance adopted is found by averaging the abundances from each ion, weighting according to the observed intensity of the line.

RLs are also used to derive ionic abundances for helium and heavier elements. In deep spectra, many more RLs may be available than CELs. The code calculates the ionic abundance from each individual RL intensity using the atomic data listed in Table 1. Then, to determine the ionic abundance to adopt, it first derives an ionic abundance for each individual multiplet from the multiplet's co-added intensity, and then averages the abundances derived for each multiplet to obtain the ionic abundance used in subsequent calculations.

### 3.5 Total elemental abundances

Generally, not all ionization stages of an ion, which are actually present in a nebula, will be detected, due to limited wavelength coverage and sensitivity. Total elemental abundances must be estimated using ionization correction schemes, which are derived from photoionization models, similarities in ionization potentials, or a combination of the two.

The code currently includes the ionisation correction factor (ICF) scheme of Kingsburgh & Barlow (1994). We plan to incorporate further ICFs, and in a forthcoming paper we will compare the magnitude of the systematic uncertainties arising from the choice of ICF with the statistical uncertainties.

### 3.6 Output

By randomizing and analysing the line list many times, it is possible to build up an accurate picture of the true distribution of statistical uncertainties associated with the chemical abundances and empirical diagnostics resulting from the line flux uncertainties. NEAT collates all of the results from each iteration, and calculates uncertainties as follows: first of all for each output parameter it extracts the values containing 34.1 per cent of all results above and below the median. The data are then binned using a bin size of 0.05 times the difference between these two values. From the binned data, the mode of the probability distribution is obtained, and the code reports the final quantity and its uncertainties as this mode, and the values such that 68.2 per cent of all results lie within the quoted uncertainties.

This approach does not assume any particular distribution of probabilities, but if the distribution is normal, log-normal or exponential-normal, then the uncertainties thus returned correspond to one standard deviation as normally defined. We find that uncertainty distributions are not always characterized and may be bimodal or multimodal (see Section 4), and we therefore recommend that users directly inspect the probability distributions. We provide with NEAT a small shell script that produces plots for easy inspection.

## 4 THE NATURE OF ACTUAL UNCERTAINTIES

In this section we discuss the nature of the uncertainties revealed by the Monte Carlo technique. We find that three distinct behaviours emerge for the uncertainties on abundances, depending on the overall depth of the line list being analysed. In some cases, where all lines being analysed are well detected, the final uncertainties are close to symmetric and can be well approximated by Gaussian distributions. However, in the nebulae that we have analysed, the final distributions are better described by log-normal distributions than by Gaussian.

In a minority of cases, very unusual uncertainty distributions emerge which cannot be sensibly fitted by analytic functions. The origin of such distributions arises in some cases from the methodology adopted. For example, if temperature diagnostic lines are weakly detected, then in some fraction of NEAT iterations the temperature may be undefined, and thus taken as the default of 10 000 K. In other iterations it may have a determined value different from 10 000 K. The temperature distribution then becomes double peaked, and this propagates into CEL abundances, although it has little effect on RL abundances. In situations like these, one can say that the true uncertainty distribution is broader even than NEAT suggests, and must realistically encompass both values of the double-peaked distribution.

At intermediate stages, different behaviours may be observed. In particular, we find that for temperatures derived from CELs, the uncertainty distribution is sometimes well characterized by an exponential-normal distribution; that is, the probability of  $e^T$  is normally distributed. In every case that we examined, though, the convolution of this distribution with the processes involved in calculating abundances resulted in a final abundance uncertainty distribution that was either normal or log-normal.

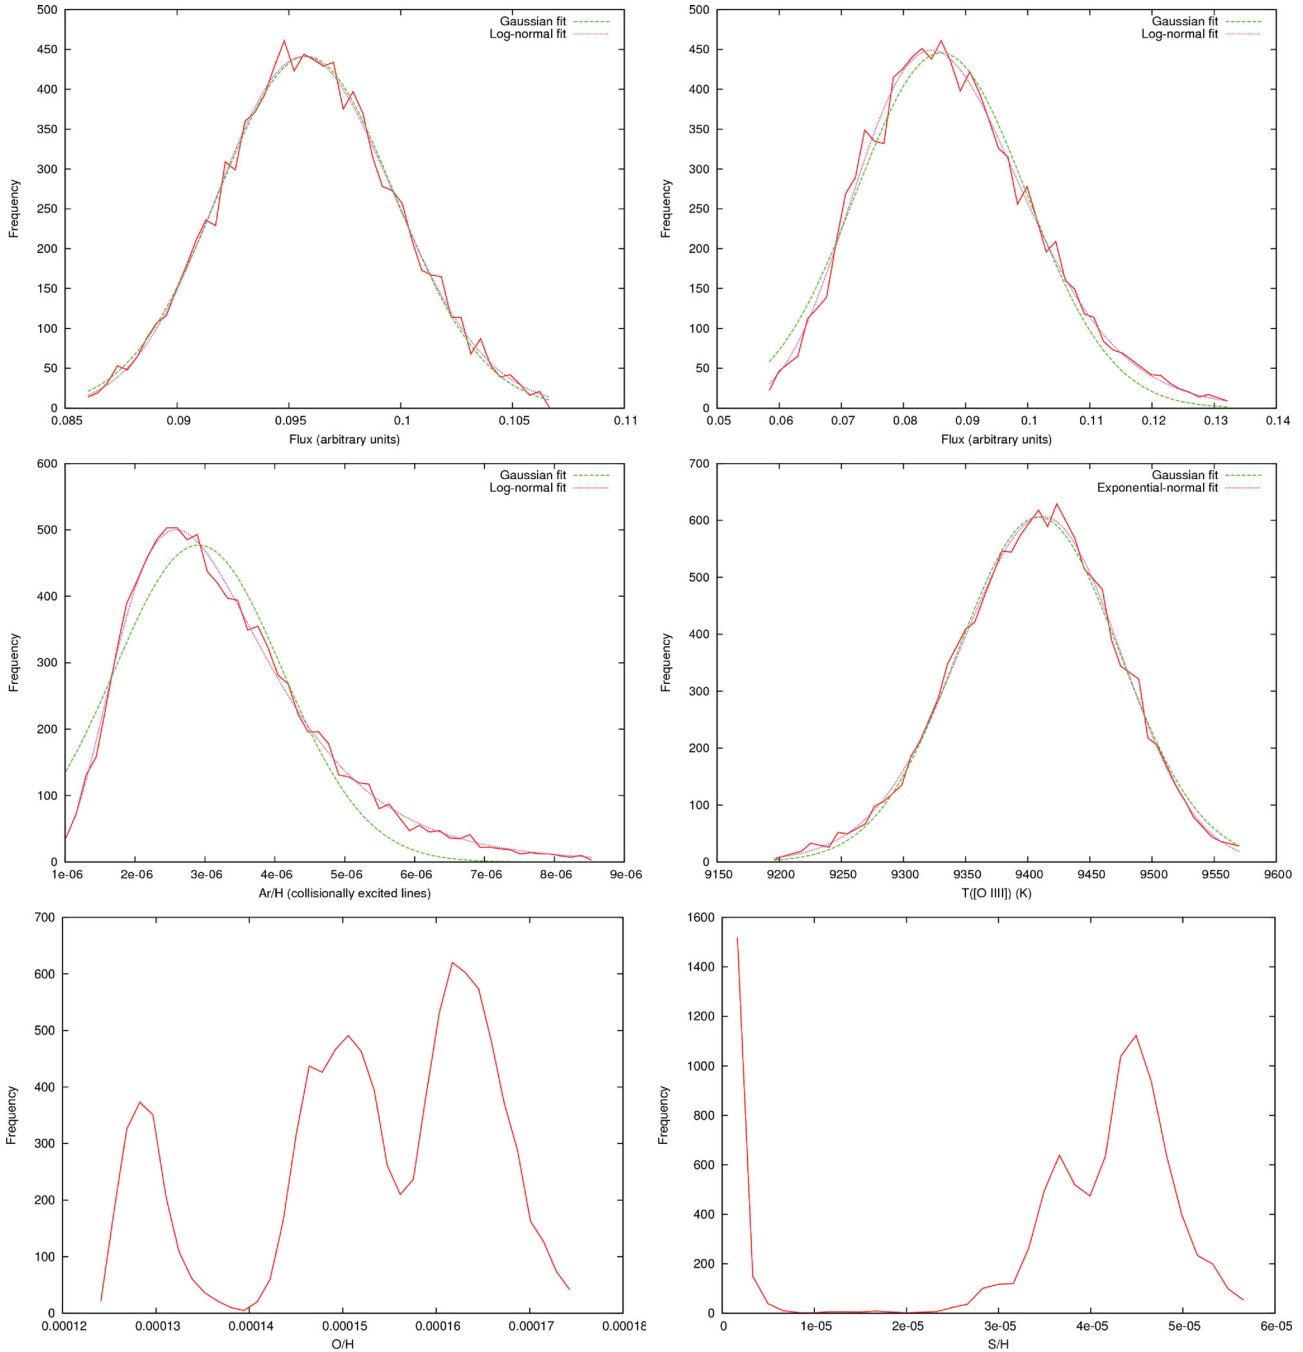

**Figure 4.** Some representative examples of probability distributions emerging from this analysis. These results are from analyses of the Orion nebula (top-left panel), WR nebula BAT99-11 (top-right panel), Cn 3-1 (middle-left panel), NGC 6803 (middle-right panel), Sp 4-1 (bottom-left panel) and DdDm 1 (bottom-right panel).

We show a selection of illustrative examples in Fig. 4, and we plot Gaussian, log-normal and exponential-normal fits to the distributions shown where possible. In Table 3 we give the parameters of the fits to the plotted distributions. The rms of the residuals is given as a quantitative measure of which distribution is a better fit to the data.

The finding that the majority of uncertainty distributions are best described by log-normal distributions demonstrates that analytic uncertainty propagation generally does not accurately quantify the true uncertainties arising from real measurements of the spectra

of astronomical objects. It also implies that temperatures, densities and abundances are generally more likely to be underestimated than overestimated, although this effect will generally be small. The emergence of unquantifiable distributions shows that analytic techniques can break down very severely; most significantly there is on the face of it no obvious difference between the line lists that give generally log-normal final uncertainties and those that give unquantifiable distributions. Thus, it appears that there is no a priori way of telling whether the uncertainties are going to be well behaved or erratic.

**Table 3.** Analytic fits to the uncertainty distributions shown in Fig. 4. Log-normal distributions emerge much more frequently than Gaussian or unquantifiable distributions. The line lists analysed are from (1) Esteban et al. (2004), (2) Stock, Barlow & Wesson (2011) and (3) Wesson, Liu & Barlow (2005). The exponential-normal parameters for NGC 6803 are those resulting from fitting the uncertainty distribution with a function in which  $\exp(T_e/1000)$  was normally distributed.

| Nebula   | Quantity            | Gaussian              |                       |                  | Log-normal         |          |                  | Reference |
|----------|---------------------|-----------------------|-----------------------|------------------|--------------------|----------|------------------|-----------|
|          |                     | $\mu$                 | $\sigma$              | rms of residuals | $\mu$              | $\sigma$ | rms of residuals |           |
| Orion    | He/H                | 0.096                 | 0.004                 | 14.0             | -1.019             | 0.041    | 13.5             | (1)       |
| BAT99-11 | He/H                | 0.086                 | 0.014                 | 23.8             | -1.073             | 0.159    | 14.7             | (2)       |
| Cn 3-1   | Ar/H                | $2.91 \times 10^{-6}$ | $1.20 \times 10^{-6}$ | 41.1             | -12.87             | 0.410    | 11.1             | (3)       |
|          |                     | Gaussian              |                       |                  | Exponential-normal |          |                  |           |
|          |                     | $\mu$                 | $\sigma$              | rms of residuals | $\mu$              | $\sigma$ | rms of residuals |           |
| NGC 6803 | $T([\text{O III}])$ | 9410                  | 65                    | 18.4             | 12231.8            | 795.0    | 15.5             | (3)       |

## 5 THE RP EFFECT

As discussed earlier, *NEAT* accounts for the RP effect, in which fluxes measured from lines with  $S/N < 6$  are generally overestimated, with the magnitude of the effect increasing as  $S/N \rightarrow 1$ . In this section we show the importance of this effect and demonstrate that flawed results will inevitably occur if the effect is ignored.

To investigate the magnitude of this effect, we reanalysed two line lists – spectra of NGC 6543, the Cat’s Eye Nebula, presented by Wesson & Liu (2004) and spectra of the Orion nebula presented by Esteban et al. (2004). In both cases we ran two instances of *NEAT*: one in which the RP effect was ignored, and all line flux uncertainties quoted in the two papers were assumed to represent Gaussian probability distributions, and the second in which the RP effect was accounted for as described in Section 3.1.3.

One important and as yet unresolved issue in nebular abundance studies is the so-called abundance discrepancy problem (see e.g. Liu 2006 for a review). The RP effect can cause errors in the assessment of the magnitude of the discrepancy; RLs of heavy elements are much weaker than the CELs of the same species, and are thus measured with lower  $S/N$  values. In almost any real astronomical spectra, regardless of the number of lines detected, the weakest lines measured will be subject to the RP effect, and for deep spectra of photoionized nebulae, the weakest lines will almost all be RLs. Thus, RL abundance measurements may be subject to an upward bias that CEL abundances are largely free from.

Fig. 5 shows that in these two nebulae, ignoring the RP effect indeed has no effect on abundances of nitrogen, oxygen and neon derived from CELs, but in all cases leads to an overestimate of the abundances derived from the RLs of these elements. Furthermore, it turns out that properly accounting for the non-Gaussian nature of the uncertainties on weak lines leads to a significant reduction in the uncertainty associated with abundances determined from them; we fit the resulting uncertainty histograms with Gaussian functions, and find that accounting for the RP effect reduces the relative standard deviation on the measured abundances by 25–30 per cent. Table 4 summarizes the mean and standard deviation of the final abundance determinations from RLs.

In other shallower spectra, it may often be the case that the auroral lines  $[\text{N II}] \lambda 5754$  and  $[\text{O III}] \lambda 4363$  are measured with low enough  $S/N$  that they become subject to the RP effect. In this case, the derived temperatures would be overestimated, and CEL abundances underestimated. To investigate this effect, we analysed the line list of H1013, an extragalactic H II region in the spiral galaxy M101, presented by Esteban et al. (2009). In this nebula, the  $[\text{O III}]$  line at  $4363 \text{ \AA}$  is detected with an  $S/N$  of only 2.7.

Fig. 6 shows that significant systematic uncertainties are produced when the RP effect on temperature diagnostic lines is ignored. When the effect is neglected, we determine an  $[\text{O III}]$  temperature of  $7480 \pm 610 \text{ K}$ , in very close agreement with the value of  $7370 \pm 630 \text{ K}$  reported by Esteban et al. (2009). However, when we account for the RP effect, we find a value of  $6840 \pm 390 \text{ K}$ . Similarly for abundances, considering  $\text{O}^2 +/\text{H}^+$ , we find that by neglecting the RP effect we obtain a value of  $7.95 \pm 0.15$  [on a logarithmic scale where  $N(\text{H}) = 12$ ], close to the value of  $8.05 \pm 0.12$  obtained by Esteban et al. (2009). Accounting for the effect yields a value of  $8.16 \pm 0.12$ .

The reduction in uncertainty when accounting for the RP effect arises in two distinct ways: first, as can be seen in Fig. 6, the probability distribution for the  $[\text{O III}]$  temperature when the RP effect is not accounted for is neither normal nor log-normal but is instead better described by an exponential-normal distribution. When the input uncertainty distribution is correctly characterized as a log-normal distribution, the convolution of this distribution with the processes which give rise to the exponential-normal distribution of temperature probabilities results in a final distribution which is narrower than when the input distribution is assumed to be normal.

The second effect is that when abundances from many weak lines are being combined to derive an abundance, accounting for the RP effect results in a modest reduction in the scatter of the derived abundances, and a corresponding reduction in the overall uncertainty on the combined abundance.

We re-emphasize, therefore, that neglecting this effect results in incorrect abundances. Accounting for it removes a source of systematic uncertainty, and reduces the statistical uncertainty of the abundances determined.

One can see in Fig. 5 that abundances derived from RLs have similar or smaller uncertainty distributions than those derived from CELs, even though the line fluxes may be several orders of magnitude lower. This reflects their very weak dependence on temperature and density; the uncertainties on the adopted temperatures and densities hardly propagate into RL abundances but have a significant effect on the CEL abundances.

## 6 INTERSTELLAR EXTINCTION

*NEAT* allows a robust propagation of uncertainties from line flux measurements into derived quantities. It is also possible to investigate the effect of statistical uncertainties arising at different stages of the process. In this section, we consider the effect of the uncertainty in  $R$ , the ratio of total-to-selective extinction given by

$$R = \frac{A(V)}{E(B - V)}. \quad (15)$$



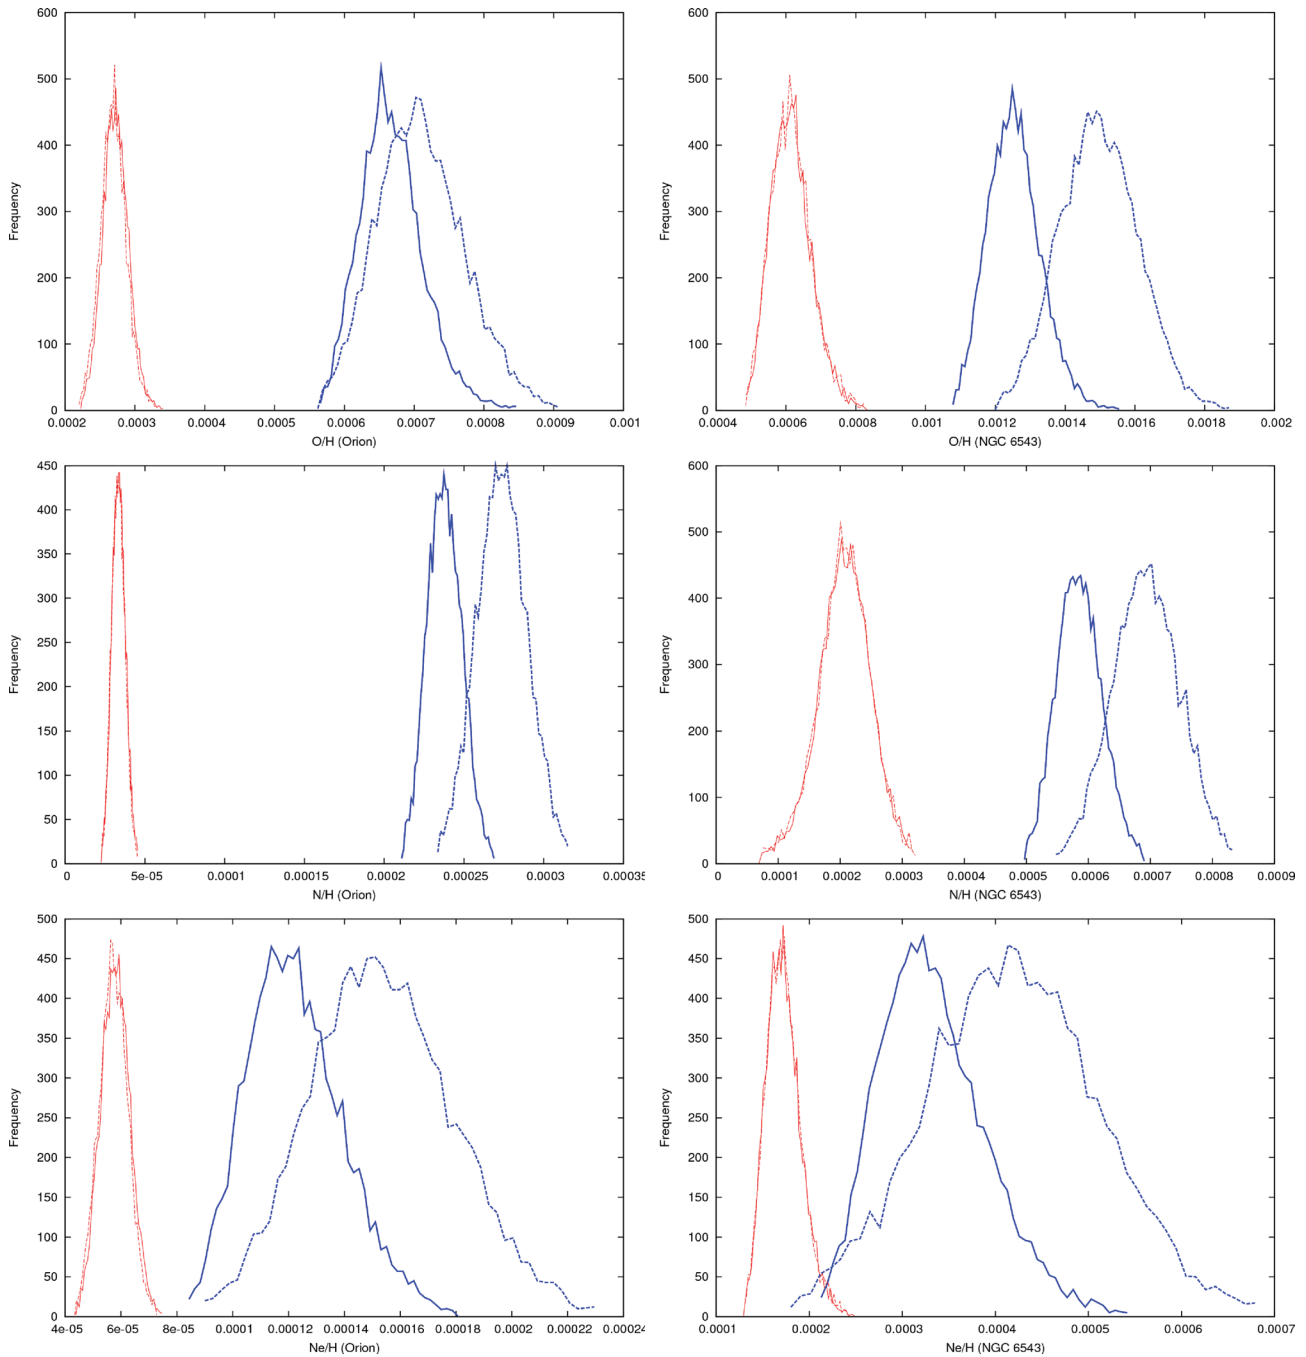

**Figure 5.** The RP effect on abundance determinations. Dashed lines show abundances derived assuming that weak line fluxes have a Gaussian uncertainty distribution. Solid lines show the results obtained by more realistically assuming a log-normal distribution as described in Section 5. Thin red and thick blue lines correspond to collisionally excited line and recombination line abundances, respectively. Only the far weaker RLs are subject to the RP effect.

It is well known that  $R$  varies along different sight lines (e.g. Valencic, Clayton & Gordon 2004; Larson & Whittet 2005), but determining its value for particular objects is generally impractical and instead, it is commonly assumed to equal 3.1. We investigate the effect of an uncertainty in this value by comparing analyses in which  $R$  is fixed to be 3.1, and in which  $R$  is drawn from a Gaussian distribution with  $\mu = 3.1$  and  $\sigma = 0.15$ . For this investigation we used the  $R$ -dependent extinction law parametrization of Cardelli et al. (1989). We took the uncertainty as the largest value that we found quoted in the literature for the diffuse ISM (Larson & Whittet 2005).

We analysed the emission-line measurements of NGC 7026 presented by Wesson et al. (2005), including the line flux uncertainties which were not published in that paper. We chose this object as it is significantly reddened [ $c(\text{H}\beta) = 1.0$ ], and has many very well detected lines in its spectrum (142 lines measured, 120 with  $S/N > 3$  and 65 with  $S/N > 10$ ). This combination should maximize the effect of an uncertainty on  $R$ , relative to the effect of the line flux measurement uncertainties.

We find that including the effect of an uncertainty in  $R$  has a noticeable effect on the probability distribution of dereddened line fluxes. However, in the conversion from line fluxes into physical

**Table 4.** Results of heavy element abundance determinations from recombination lines, using the published line lists of Wesson & Liu (2004) and Esteban et al. (2004) for the Orion nebula.

| Element  | $10^4 \times X/H$ (RP ignored) | $10^4 \times X/H$ (RP included) | $\frac{\sigma/\mu}{\sigma/\mu}$ (RPincluded)<br>$\frac{\sigma/\mu}{\sigma/\mu}$ (RPignored) |
|----------|--------------------------------|---------------------------------|---------------------------------------------------------------------------------------------|
| Orion    |                                |                                 |                                                                                             |
| N        | $2.74 \pm 0.16$                | $2.37 \pm 0.11$                 | 0.79                                                                                        |
| O        | $7.04 \pm 0.63$                | $6.63 \pm 0.43$                 | 0.73                                                                                        |
| Ne       | $1.52 \pm 0.26$                | $1.20 \pm 0.17$                 | 0.83                                                                                        |
| NGC 6543 |                                |                                 |                                                                                             |
| N        | $6.93 \pm 0.56$                | $5.83 \pm 0.37$                 | 0.78                                                                                        |
| O        | $14.94 \pm 1.15$               | $12.48 \pm 0.74$                | 0.77                                                                                        |
| Ne       | $4.17 \pm 0.94$                | $3.23 \pm 0.56$                 | 0.77                                                                                        |

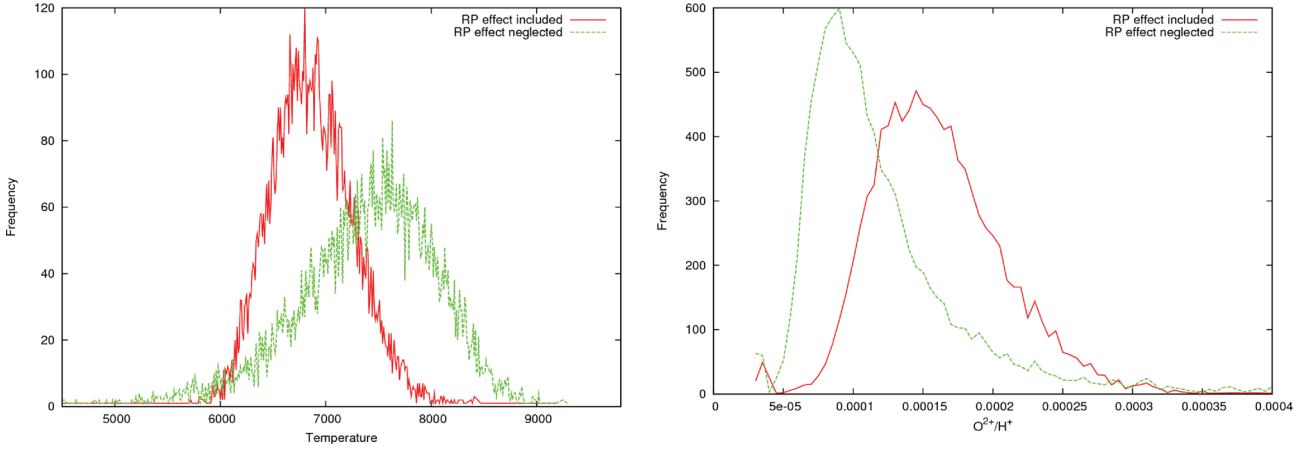

**Figure 6.** The RP effect when CEL temperature diagnostic lines are measured with low S/N. The figure shows a reanalysis of data for the H II region H1013, showing the RP effect on the derived [O III] temperature ( $l$ ) and  $O^{2+}/H^+$  abundance ( $r$ ).

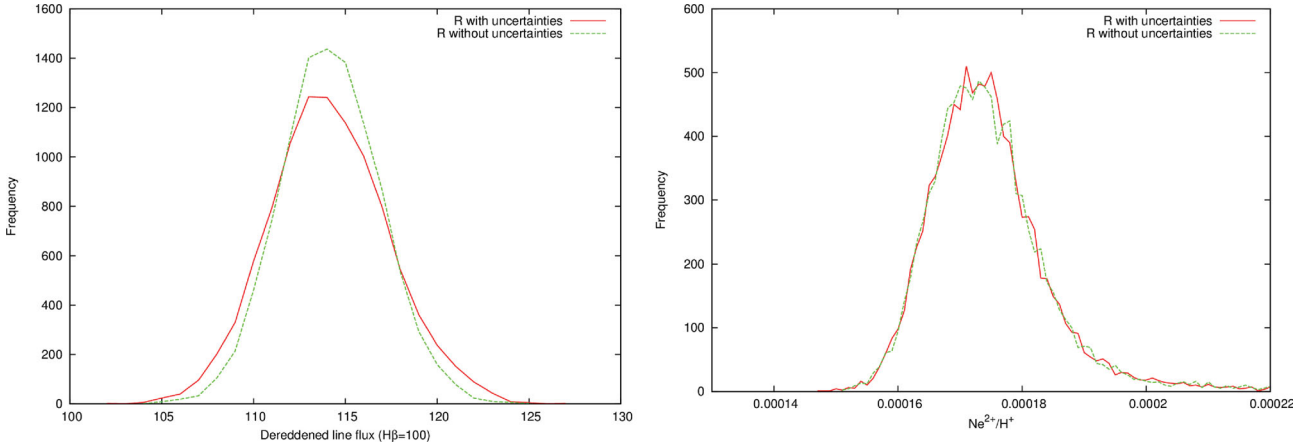

**Figure 7.** The effect of an assumed uncertainty in  $R$ , the ratio of selective-to-total extinction, on the dereddened line flux of the [Ne III] line at  $3868 \text{ \AA}$  ( $l$ ) and derived  $Ne^{2+}/H^+$  abundance ( $r$ ).

quantities, the statistical uncertainties arising from line flux measurements completely dominate, and the probability distributions are statistically identical whether  $R$  is assumed to be fixed or allowed to vary. This result is shown in Fig. 7, where we plot the probability distributions for the [Ne III]  $3868 \text{ \AA}$  dereddened line flux, and the abundance derived from it. The effect on the derived abundance of the assumed uncertainty on  $R$  is negligible.

## 7 DISCUSSION

Motivated by the necessity of properly understanding sources of uncertainties in analyses of photoionized nebulae, we have presented a new code for calculating chemical abundances in photoionized nebulae, which also robustly calculates the statistical uncertainties on the abundances determined. The code is freely available and we welcome bug reports and feature requests.

Analytic methods of uncertainty propagation rely on assumptions that typically do not hold for real astronomical data, and therefore we have adopted a Monte Carlo approach. We have shown that the analytic approach does not give a good estimate of the true statistical uncertainties.

We have provided in the code a means for accounting for the well-known upward bias in flux measurements of weak lines, and we show that doing so results in reduced statistical as well as systematic uncertainties in abundance determinations. This effect should not be ignored in any analyses of emission-line spectra; in almost any data set, the weakest lines will be subject to the effect, and if these lines are used in the analysis, then incorrect results will be obtained if the RP effect is ignored. If, as is commonly the case, RLs make up the majority of the weak lines, then systematic misunderstandings may arise if the effect is neglected. In the examples that we have analysed, however, this effect is too small to account for the magnitude of the discrepancy typically found between RL and CEL abundance determinations.

Finally, we have shown that possible uncertainties in the value of  $R$  have a negligibly small effect on the uncertainties on the final quantities.

In the present analysis we have considered only statistical uncertainties. The correct propagation of these, as we have seen, can reduce their final magnitude. However, results obtained using *NEAT* are of course subject to systematic uncertainties as well. These have many potential origins: systematic uncertainties in atomic data and the choice of atomic data to use for each ion; the choice of interstellar extinction law; the choice of ionization correction scheme; the methodology of calculating the temperatures and densities to use for the abundance calculations; unjustified assumptions in the analysis such as assumptions of constant temperatures and densities; correction for underlying stellar absorption in certain types of nebula; and others that may yet be unknown. As Kwitter & Henry (2011) point out, investigators starting from an identical line list may arrive at quite different results, depending on what choices they make regarding the sources of these systematic uncertainties.

Two questions which arise regarding these uncertainties are as follows.

- (i) Which systematic choices are the most important?
- (ii) What is the statistical significance of the systematic uncertainties?

Through a proper understanding of statistical uncertainties, it may be possible to answer these questions. For example, by comparing the systematic uncertainty introduced by varying the choice of reddening law with the statistical uncertainty arising from line flux measurement, one could determine quantitatively whether or not the choice of reddening law is crucial or relatively inconsequential. In a forthcoming paper we plan to extend this type of analysis to quantify the effects of systematic choices in terms of statistical uncertainties, and thus to be able to determine the relative importance of each of the systematic choices being made.

## ACKNOWLEDGMENTS

We thank Professors Ian Howarth and Mike Barlow for useful discussions, Mahesh Mohan for testing an early version of the code, Bruce Duncan for helping us optimize the code, and the organizers of the workshop ‘Uncertainties in atomic data and how they propagate in chemical abundances’ for providing an extremely fruitful forum for interaction between atomic data providers and users. We

also thank the anonymous referee for their very useful comments and suggestions. This work was co-funded under the Marie Curie Actions of the European Commission (FP7-COFUND). DJS is supported by an NSERC Discovery Accelerator Grant. PS is supported by the ESO Studentship Programme.

## REFERENCES

- Cardelli J. A., Clayton G. C., Mathis J. S., 1989, *ApJ*, 345, 245  
 Davey A. R., Storey P. J., Kisielius R., 2000, *A&AS*, 142, 85  
 Dere K. P., Landi E., Young P. R., Del Zanna G., Landini M., Mason H. E., 2009, *A&A*, 498, 915  
 Escalante V., Victor G. A., 1990, *ApJS*, 73, 513  
 Esteban C., Peimbert M., García-Rojas J., Ruiz M. T., Peimbert A., Rodríguez M., 2004, *MNRAS*, 355, 229  
 Esteban C., Bresolin F., Peimbert M., García-Rojas J., Peimbert A., Mesa-Delgado A., 2009, *ApJ*, 700, 654  
 Fitzpatrick E. L., Massa D., 1990, *ApJS*, 72, 163  
 García-Rojas J., Esteban C., 2007, *ApJ*, 670, 457  
 Howarth I. D., 1983, *MNRAS*, 203, 301  
 Huggins W., Miller W. A., 1864, *Philos. Trans. R. Soc. Lond. I*, 154, 437  
 Karakas A. I., van Raai M. A., Lugaro M., Sterling N. C., Dinerstein H. L., 2009, *ApJ*, 690, 1130  
 Kinderman A. J., Monahan J. F., 1977, *ACM Trans. Math. Software*, 3, 257  
 Kingdon J., Ferland G. J., 1995, *ApJ*, 442, 714  
 Kingsburgh R. L., Barlow M. J., 1994, *MNRAS*, 271, 257  
 Kisielius R., Storey P. J., Davey A. R., Neale L. T., 1998, *A&AS*, 133, 257  
 Kisielius R., Storey P. J., Ferland G. J., Keenan F. P., 2009, *MNRAS*, 397, 903  
 Kwitter K. B., Henry R. B. C., 2011, preprint (arXiv:1109.2502)  
 Landi E., Del Zanna G., Young P. R., Dere K. P., Mason H. E., Landini M., 2006, *ApJS*, 162, 261  
 Larson K. A., Whittet D. C. B., 2005, *ApJ*, 623, 897  
 Liu X.-W., 2006, in Barlow M. J., Méndez R. H., eds, *Proc. IAU Symp. 234, Planetary Nebulae in our Galaxy and Beyond*. Cambridge Univ. Press, Cambridge, p. 219  
 Liu X.-W., Storey P. J., Barlow M. J., Clegg R. E. S., 1995, *MNRAS*, 272, 369  
 Liu X.-W., Barlow M. J., Zhang Y., Bastin R. J., Storey P. J., 2006, *MNRAS*, 368, 1959  
 Maeder A., 1992, *A&A*, 264, 105  
 Magrini L., Stanghellini L., Gonçalves D. R., 2011, preprint (arXiv:1110.1186)  
 Matteucci F., 2003, *The Chemical Evolution of the Galaxy*. Springer, Berlin  
 Mendoza C., 1983, in Flower D. R., ed., *Proc. IAU Symp. 103, Planetary Nebulae*. Reidel, Dordrecht, p. 143  
 Mendoza C., Zeppen C. J., 1982, *MNRAS*, 199, 1025  
 Pagel B. E. J., 1997, *Nucleosynthesis and Chemical Evolution of Galaxies*. Cambridge Univ. Press, Cambridge  
 Pequignot D., Petitjean P., Boisson C., 1991, *A&A*, 251, 680  
 Pradhan A. K., 1976, *MNRAS*, 177, 31  
 Prevot M. L., Lequeux J., Prevot L., Maurice E., Rocca-Volmerange B., 1984, *A&A*, 132, 389  
 Rola C., Pelat D., 1994, *A&A*, 287, 676 (RP94)  
 Smits D. P., 1996, *MNRAS*, 278, 683  
 Stock D. J., Barlow M. J., Wesson R., 2011, *MNRAS*, 418, 2532  
 Storey P. J., 1994, *A&A*, 282, 999  
 Storey P. J., Hummer D. G., 1995, *MNRAS*, 272, 41  
 Tsamis Y. G., Walsh J. R., Péquignot D., Barlow M. J., Danziger I. J., Liu X.-W., 2008, *MNRAS*, 386, 22  
 Valencic L. A., Clayton G. C., Gordon K. D., 2004, *ApJ*, 616, 912  
 Wesson R., Liu X.-W., 2004, *MNRAS*, 351, 1026  
 Wesson R., Liu X.-W., Barlow M. J., 2005, *MNRAS*, 362, 424  
 Zeppen C. J., 1982, *MNRAS*, 198, 111

This paper has been typeset from a  $\text{\TeX}/\text{\LaTeX}$  file prepared by the author.
